# Supplementary material for: The use of web-based diaries in sexual risk behaviour research: a systematic review
Source: HighWire-hosted journal article supplement (doi:10.1136/sextrans-2013-051472), 2014-04-10

**Figure 2: Association between Daily Compensation Amount and Diary Completion Rate Among Studies Using Web-Based Diaries**

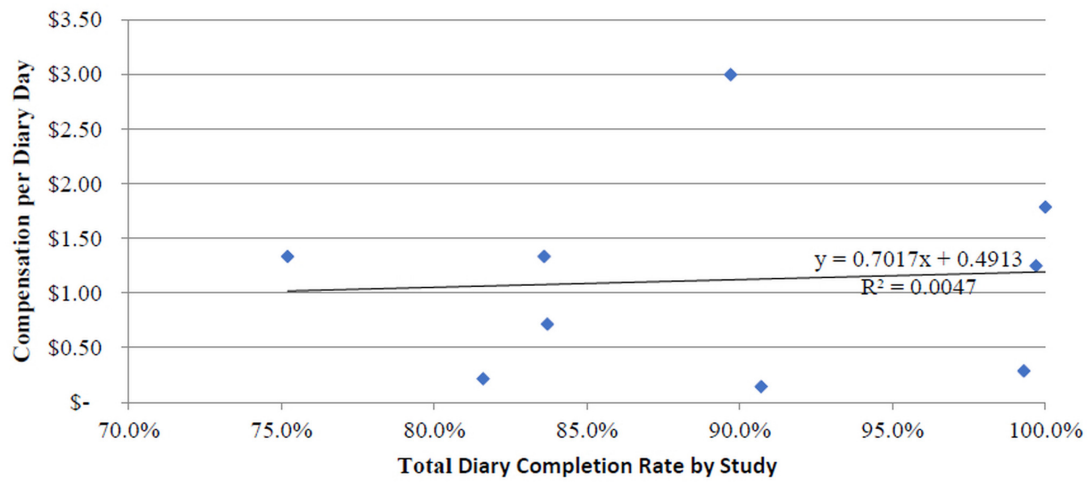

Supplement: sextrans-2013-051472supp_figure.pdf [file sextrans-2013-051472supp_figure.pdf]
