# Supplementary material for: The use of web-based diaries in sexual risk behaviour research: a systematic review
Source: HighWire-hosted journal article supplement (doi:10.1136/sextrans-2013-051472), 2014-04-10
Supplement: sextrans-2013-051472supp_table.pdf [file sextrans-2013-051472supp_table.pdf]

## APPENDIX 1

| <b>Table 4: Descriptive Characteristics of Studies Included in Final Review (N=15)</b> |                              |          |
|----------------------------------------------------------------------------------------|------------------------------|----------|
|                                                                                        | <b>N (unique studies=15)</b> | <b>%</b> |
| <b>Diary Medium</b>                                                                    |                              |          |
| Website                                                                                | 13                           | 86.7%    |
| Email                                                                                  | 1                            | 6.7%     |
| Cell phone                                                                             | 1                            | 6.7%     |
| <b>Diary Frequency*</b>                                                                |                              |          |
| >1 entry per day                                                                       | 1                            | 6.7%     |
| Daily                                                                                  | 8                            | 53.3%    |
| Twice weekly                                                                           | 1                            | 6.7%     |
| Weekly                                                                                 | 4                            | 26.7%    |
| Biweekly                                                                               | 3                            | 20.0%    |
| <b>Data Collection Time</b>                                                            |                              |          |
| <4 weeks                                                                               | 1                            | 6.7%     |
| 1 month                                                                                | 7                            | 46.7%    |
| 5 weeks – 3 months                                                                     | 4                            | 26.7%    |
| 13 weeks – 6 months                                                                    | 0                            | 0.0%     |
| >6 months                                                                              | 3                            | 20.0%    |
| <b>Population Studied</b>                                                              |                              |          |
| Men who have sex with men                                                              | 7                            | 46.7%    |
| University students                                                                    | 5                            | 33.3%    |
| STI clinic patients                                                                    | 1                            | 6.7%     |
| Men (general population)                                                               | 1                            | 6.7%     |
| Young adults                                                                           | 1                            | 6.7%     |
| <b>Sample Size</b>                                                                     |                              |          |
| <50                                                                                    | 3                            | 20.0%    |
| 50-100                                                                                 | 4                            | 26.7%    |
| 101-500                                                                                | 6                            | 40%      |
| 501-1,000                                                                              | 0                            | 0%       |
| >1,000                                                                                 | 2                            | 13.3%    |
| <b>Measures Collected*</b>                                                             |                              |          |
| Condom use                                                                             | 13                           | 86.7%    |
| Partner type                                                                           | 12                           | 73.3%    |
| Type of sex                                                                            | 12                           | 73.3%    |
| Partner-specific data                                                                  | 9                            | 60.0%    |
| Substance use                                                                          | 7                            | 46.7%    |
| Mood                                                                                   | 5                            | 33.3%    |
| Partner HIV status                                                                     | 4                            | 26.7%    |
| Partner name or initials                                                               | 3                            | 20.0%    |
| Sexual event location                                                                  | 3                            | 20.0%    |
| Method of meeting partner                                                              | 2                            | 13.3%    |
| Lubrication use                                                                        | 2                            | 13.3%    |
| Contraception                                                                          | 2                            | 13.3%    |
| Partner age                                                                            | 2                            | 13.3%    |
| Relationship satisfaction                                                              | 1                            | 6.7%     |
| Partner circumcision                                                                   | 1                            | 6.7%     |

|                                                    |    |       |
|----------------------------------------------------|----|-------|
| Non-sexual behaviors                               | 1  | 6.7%  |
| <b>Compensation*</b>                               |    |       |
| <b>Financial</b>                                   | 12 | 80%   |
| Prorated on diary completion                       | 2  | 13.3% |
| Flat payment for participation                     | 2  | 13.3% |
| Paid per entry, bonus for high completion          | 3  | 20.0% |
| Paid per entry, no bonus                           | 3  | 20.0% |
| Paid per entry, amount increased over time         | 1  | 6.7%  |
| Lottery entry (cash prize) for high completion     | 1  | 6.7%  |
| <b>Academic Credit</b>                             | 2  | 13.3% |
| Plus money                                         | 1  | 6.7%  |
| Plus lottery entry for high completion             | 1  | 6.7%  |
| <b>Other</b>                                       | 2  | 13.3% |
| Condoms                                            | 1  | 6.7%  |
| Free cell phone access                             | 1  | 6.7%  |
| <b>Not Mentioned</b>                               | 2  | 13.3% |
| <b>Adjustments for Missing Data</b>                |    |       |
| Imputation                                         | 1  | 6.7%  |
| Modeling accounted for missing data                | 3  | 20.0% |
| Excluded participants with missing data            | 3  | 20.0% |
| Mentioned missing data but no specific adjustments | 3  | 20.0% |
| Did not mention missing data or adjustment methods | 5  | 33.3% |

\*Studies may have fit more than one category; percentages sum to >100%
